# Supplementary material for: Role of the electrode-edge in optically sensitive three-dimensional carbon foam-MoS2based high-performance micro-supercapacitors
Source: Royal Society of Chemistry journal article supplement (doi:10.1039/d2ta09002c), 2023-01-01
Supplement: d2ta09002c1.pdf [file d2ta09002c1.pdf]

## Supporting Information

# **Role of the electrode-edge in optically sensitive three-dimensional carbon foam-MoS<sub>2</sub> based high-performance micro-supercapacitors**

Sumana Kumar<sup>a</sup>, Anwasha Mukherjee<sup>a</sup>, Swanand Telpande<sup>b</sup>, Ayon Das Mahapatra<sup>a</sup>, Praveen Kumar<sup>b</sup>, Abha Misra<sup>\*a</sup>

<sup>a</sup>Department of Instrumentation and Applied Physics, Indian Institute of Science, Bangalore, Karnataka 560012, India. E-mail: abha@iisc.ac.in

<sup>b</sup>Department of Materials Engineering, Indian Institute of Science, Bangalore, Karnataka 560012, India

\*Corresponding author, Email: [abha.misra1@gmail.com](mailto:abha.misra1@gmail.com)

## Calculations

The gravimetric capacitances ( $C_S, F/g$ ) were calculated from the CV curve at different scan rates by the equation,<sup>1</sup>

$$C_S = \frac{\int IdV}{mv\Delta V} \quad (1)$$

Where,  $\int IdV$  denotes the area under the CV curve,  $m$  is the mass of active material of the working electrode (g),  $v$  is the scan rate (V/s), and  $\Delta V$  is the operating potential range (V).

The gravimetric capacitance ( $C_S, F/g$ ) was evaluated from the CD curve using the following equation,<sup>2</sup>

$$C_S = \frac{I\Delta t}{m\Delta V} \quad (2)$$

Where,  $I$  is the discharge current (A) and  $\Delta t$  is the discharge time (s) after the voltage (IR) drop.

The areal specific capacitances ( $C_A, F/cm^2$ ) were calculated from the CV curves using the following equation,<sup>2</sup>

$$C_A = \frac{\int IdV}{Av\Delta V} \quad (3)$$

Where,  $A$  is the entire device area including electrodes and the gap between the electrodes ( $cm^2$ ).

The volumetric capacitances ( $C_V, F/cm^3$ ) were calculated from the CV curves using the equation,

$$C_V = \frac{C_A}{d} \quad (4)$$

Where,  $d$  is the thickness of coated material on electrodes (cm).

The energy ( $E_A, Wh/cm^2$ ) and power density ( $P_A, W/cm^2$ ) of the devices were evaluated by the following equations, respectively.<sup>2</sup>

$$E_A = \frac{1}{2} \times C_A \times \frac{(\Delta V)^2}{3600} \quad (5)$$

$$P_A = \frac{E_A}{\Delta t} \times 3600 \quad (6)$$

Where,  $\Delta t$  is the discharge time (s).

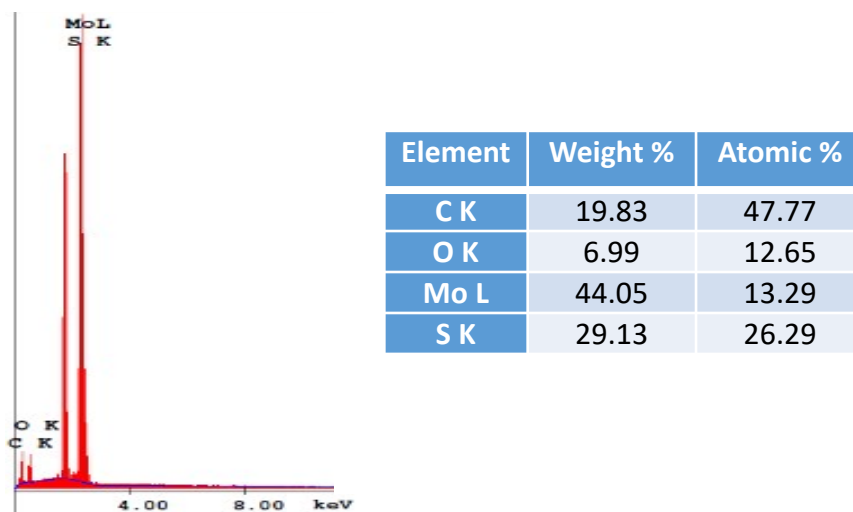

Figure S1: EDX spectrum of CF-MoS<sub>2</sub> composite.

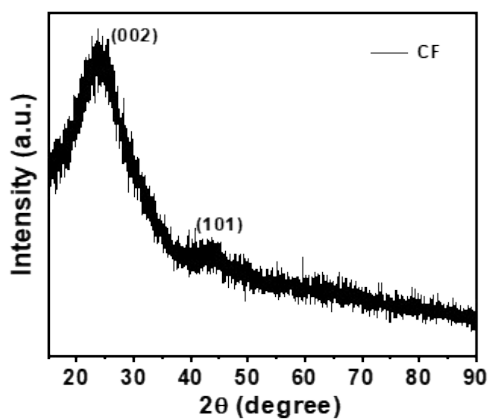

Figure S2: XRD pattern of CF.

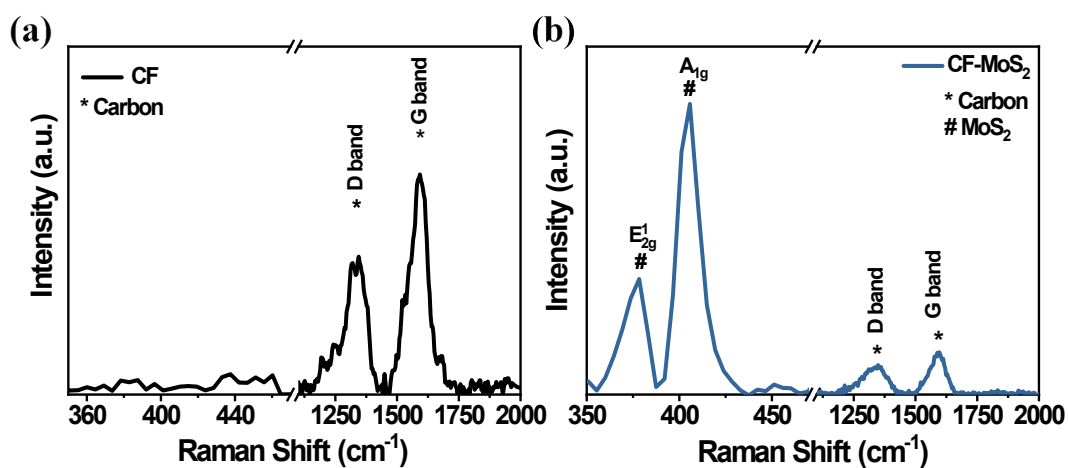

Figure S3. Raman spectra of (a) CF and (b) CF-MoS<sub>2</sub>.

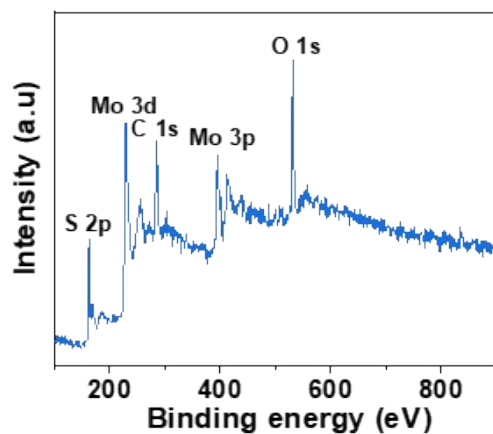

Figure S4: XPS survey spectra of CF-MoS<sub>2</sub> hybrid.

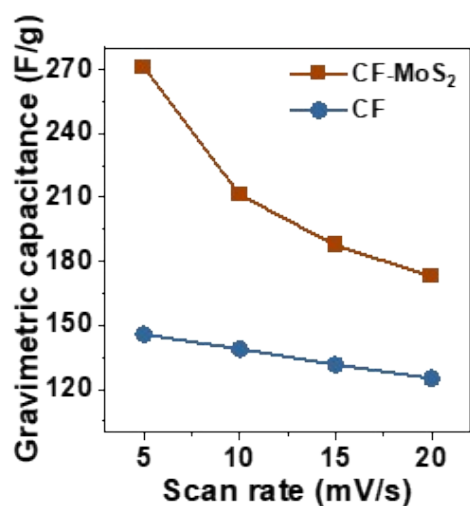

Figure S5: Gravimetric capacitance as a function of scan rates for CF-MoS<sub>2</sub> hybrid and CF.

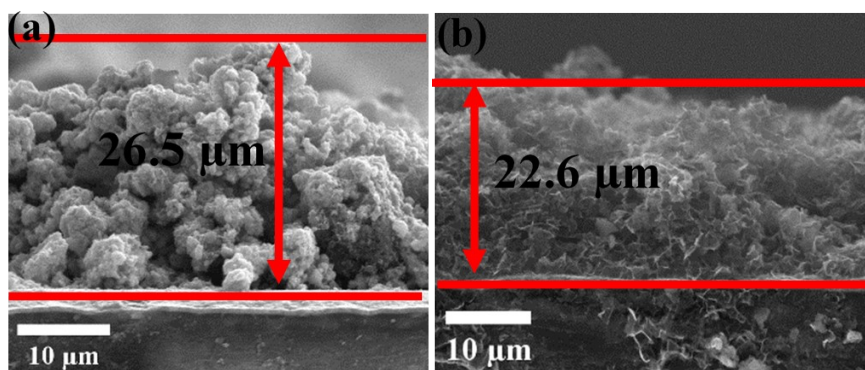

Figure S6: Cross-sectional SEM image of (a) CF-MoS<sub>2</sub> composite and, (b) CF coated working electrodes.

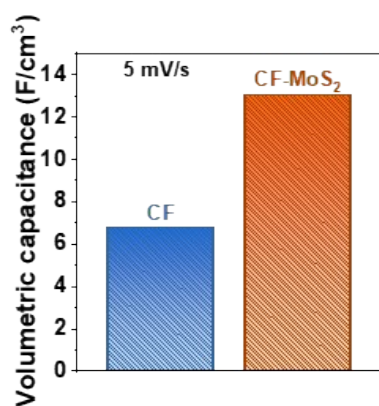

Figure S7: Comparison of volumetric capacitance of CF and CF-MOS<sub>2</sub> at a scan rate of 5 mV/s.

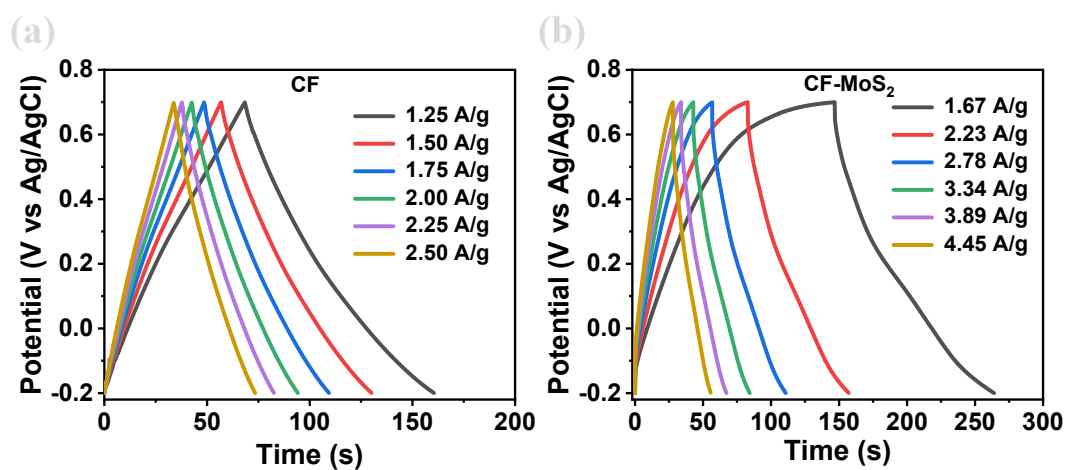

Figure S8: CD curves of (a) CF and (b) CF-MoS<sub>2</sub> electrode at various current densities.

Table S1: Gravimetric capacitance comparison of CF-MoS<sub>2</sub> with reported nanostructured MoS<sub>2</sub> and MoS<sub>2</sub>-based composites.

| <b>MoS<sub>2</sub> material</b>         | <b>Method of preparation</b>     | <b>Electrochemical properties</b>       | <b>Reference</b> |
|-----------------------------------------|----------------------------------|-----------------------------------------|------------------|
| MoS <sub>2</sub> /rGO                   | Microwaves                       | 148 F/g at 10 mV/s                      | <sup>3</sup>     |
| MoS <sub>2</sub> nanosheets             | Hydrothermal                     | 129.2 F/g at 1A/g                       | <sup>4</sup>     |
| MoS <sub>2</sub> nanostructure          | Hydrothermal                     | 106 F/g at 5mV/s                        | <sup>5</sup>     |
| MoS <sub>2</sub> microspheres           | Biopolymer-assisted Hydrothermal | 185 F/g at 1 A/g                        | <sup>6</sup>     |
| C/MoS <sub>2</sub> nanocomposites       | Hydrothermal                     | 210 F/g at 1 A/g                        | <sup>7</sup>     |
| MoS <sub>2</sub> /RCF composite         | Hydrothermal                     | 214.8 at 1 A/g                          | <sup>8</sup>     |
| MoS <sub>2</sub> /C composite           | Hydrothermal                     | 201.4 F/g@ 0.2 A/g                      | <sup>9</sup>     |
| MoS <sub>2</sub> -titanium plate        | Hydrothermal                     | 133 F/g@ 1A/g                           | <sup>10</sup>    |
| Yolk-shell MoS <sub>2</sub> microsphere | Hydrothermal                     | 161.4 F/g at 1 A/g                      | <sup>11</sup>    |
| CF-MoS <sub>2</sub>                     | Hydrothermal                     | 270 F/g at 5 mV/s<br>226 F/g at 1.6 A/g | <b>This work</b> |

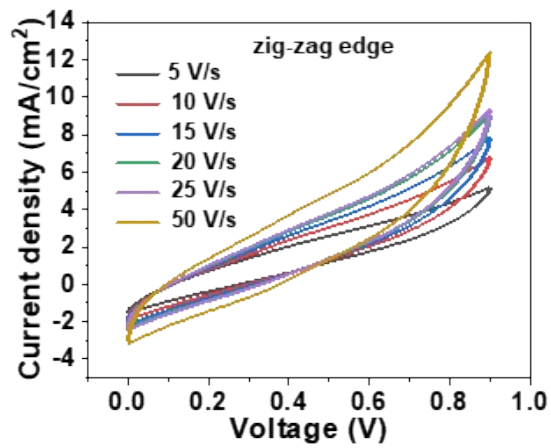

Figure S9: CV curves of CF-MoS<sub>2</sub> material coated zig-zag electrode based micro-supercapacitors at high scan rates ranging from 5 to 50 V/s.

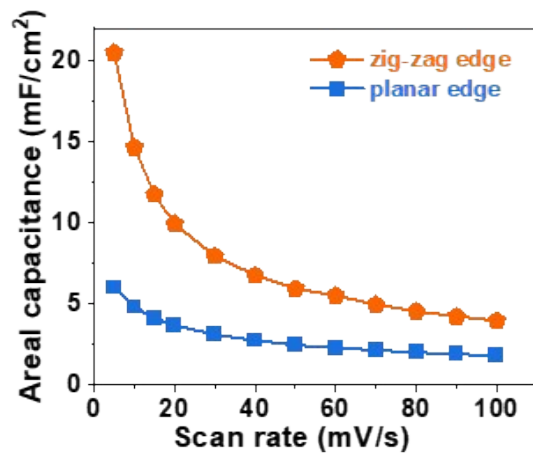

Figure S10: Areal specific capacitance calculated from CV curves at different scan rates ranging from 5 to 100 mV/s.



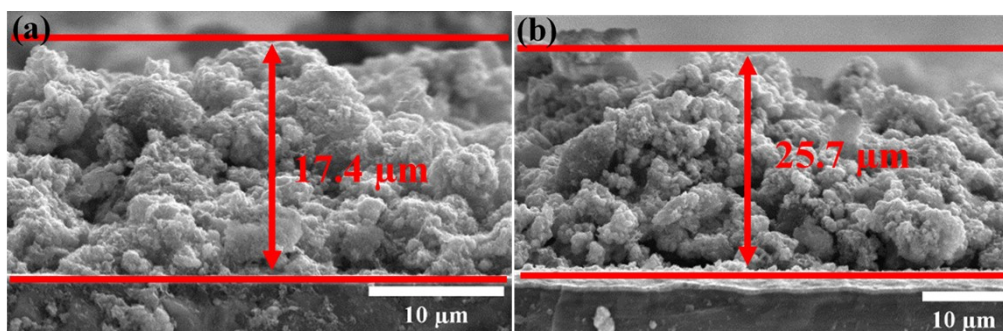

Figure S11: Cross-sectional SEM image of (c) CF-MoS<sub>2</sub> composite coated zig-zag electrodes, (d) CF-MoS<sub>2</sub> composite coated interdigitated electrodes.

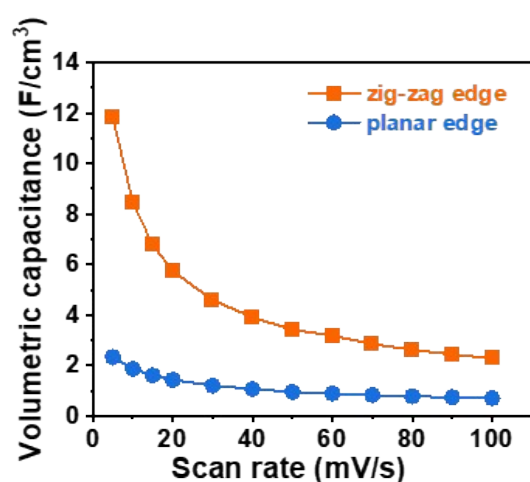

Figure S12: Volumetric capacitance calculated from CV curves at different scan rates ranging from 5 to 100 mV/s.

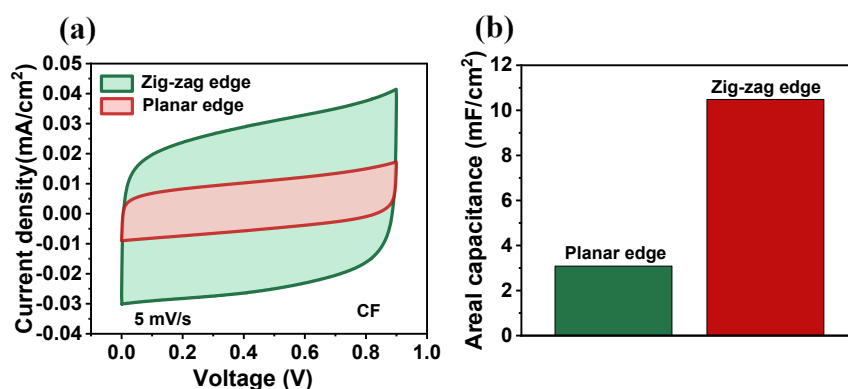

Figure S13: (a) CV responses and (b) comparison of areal specific capacitance with zig-zag edge and planar edge electrodes using CF as electrode material at a scan rate of 5 mV/s.

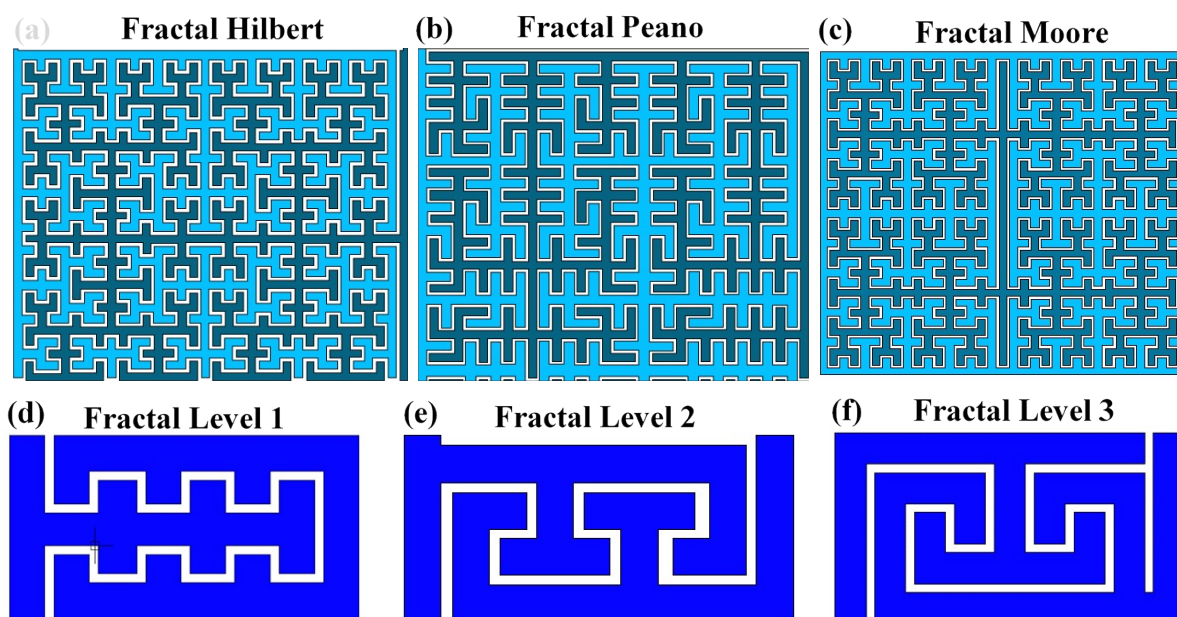

Figure S14: Schematics of different type of Fractal electrode geometry ((a)-(c): adapted from previous reference<sup>12</sup> and (d)-(f): adapted from previous reference<sup>13</sup>).

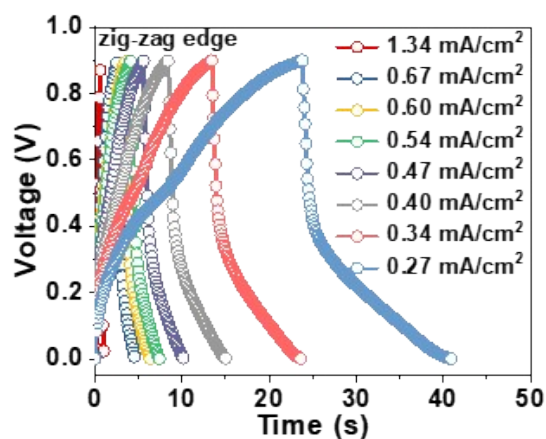

Figure S15: Charge-discharge curves of zig-zag edge electrode based micro-supercapacitors at different applied current densities.

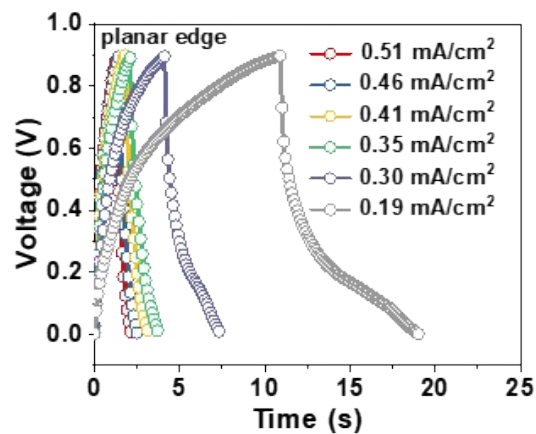

Figure S16: Charge-discharge curves of planar edge electrode based micro-supercapacitors at different applied current densities.

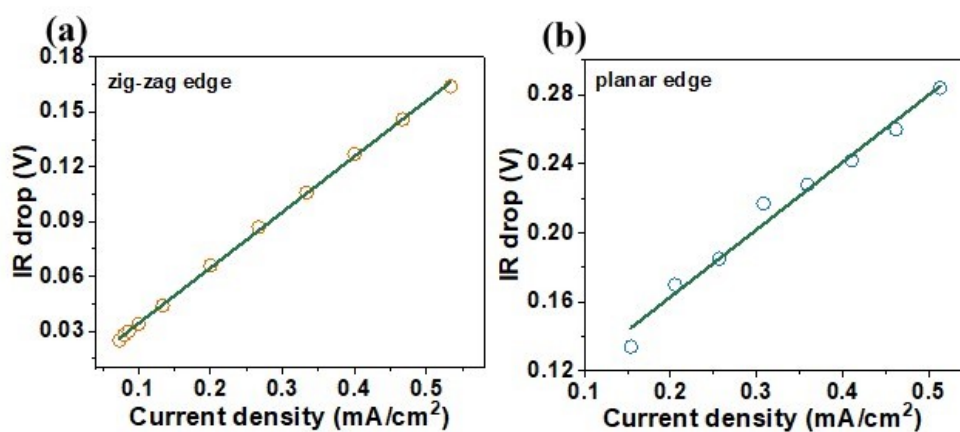

Figure S17: (a) The voltage drop (IR drop) associated with zig-zag micro-supercapacitor versus different current densities. (b) The voltage drop (IR drop) is associated with planar edge micro-supercapacitor versus different current densities.

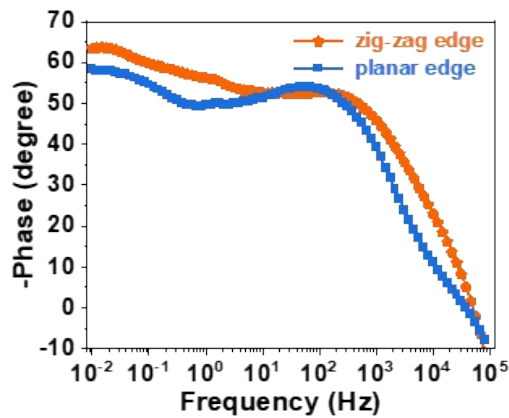

Figure S18: Bode plot of zig-zag edge and planar edge micro-supercapacitors.

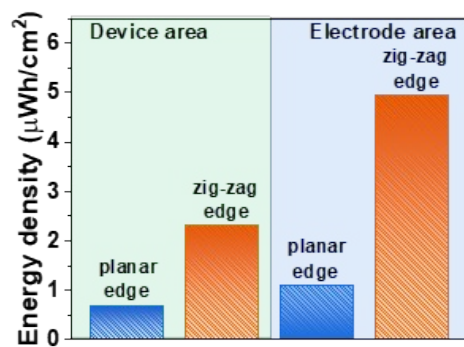

Figure S19: Ragone plot of the zig-zag edge and planar edge micro-supercapacitors calculated from CV curve, considering total area of the device and area of the electrodes (excluding gap between the fingers) at a scan rate of 5 mV/s.

Table S2: Capacitance retention comparison of zig-zag edge micro-supercapacitor with reported micro-supercapacitors.

| Micro-supercapacitor structure             | Electrolyte                            | Retention          | Reference        |
|--------------------------------------------|----------------------------------------|--------------------|------------------|
| MoS <sub>2</sub> film                      | aqueous electrolytes                   | 92%(1000)          | 14               |
| MoS <sub>2</sub> /RGO                      | 1 M HClO <sub>4</sub>                  | 92% (1000)         | 3                |
| MoS <sub>2</sub> /polypyrrole(PPy)         | 1 M KCl                                | 85% (4000)         | 15               |
| 3D PEDOT:PSS/graphene                      | PVA/H <sub>2</sub> SO <sub>4</sub>     | 88.6%(5000)        | 16               |
| GP/PANI-G/GP                               | PVA/H <sub>2</sub> SO <sub>4</sub>     | 80.9%(5000)        | 17               |
| PEDOT                                      | PVA/LiCl                               | 96.6%(5000)        | 18               |
| MoS <sub>2</sub> -rGO hybrid               | PVA/H <sub>2</sub> SO <sub>4</sub>     | 88.6% (5000)       | 19               |
| Inkjet printed MoS <sub>2</sub>            | PVA/ H <sub>2</sub> SO <sub>4</sub>    | 85.6%10000)        | 20               |
| MXene/graphene aerogels                    | 6 M KOH                                | 90% (10000)        | 21               |
| MXene                                      | PVA/Na <sub>2</sub> SO <sub>4</sub>    | 91.4%(10000)       | 22               |
| MnO <sub>x</sub> /Au                       | 1 M Li <sub>2</sub> SO <sub>4</sub>    | 74.1%(15000)       | 23               |
| MoS <sub>2</sub> /nanoporous graphene film | PVA/H <sub>3</sub> PO <sub>4</sub>     | 82.2%(20000)       | 24               |
| <b>CF-MoS<sub>2</sub></b>                  | <b>PVA/H<sub>2</sub>SO<sub>4</sub></b> | <b>96.2%(5000)</b> | <b>This work</b> |

Table S3: A comparison of the perimeter to surface area ratio for different electrode designs.

| Electrode geometry | Change in perimeter-to-surface area ratio compared to IDE (%) | Reference |
|--------------------|---------------------------------------------------------------|-----------|
| Fractal Moore      | 30.46                                                         | 12        |
| Fractal Peano      | 26                                                            | 12        |
| Fractal Hilbert    | 39.5                                                          | 12        |
| Zig-Zag edge       | 50                                                            | This work |

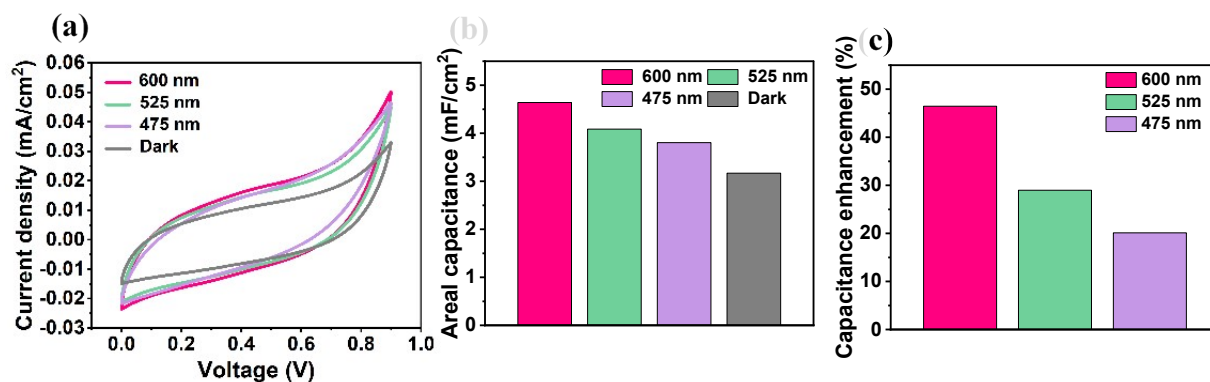

Figure S20: (a) CV curves in dark and under illumination using wavelengths of 600 nm, 525 nm, and 475 nm at a scan rate of 5 mV/s. (b) Areal capacitance comparison in dark and under illumination (600 nm, 525 nm, and 475 nm) obtained from CV. (c) Capacitance enhancement under illumination using 600 nm, 525 nm, and 475 nm in comparison with the dark condition.

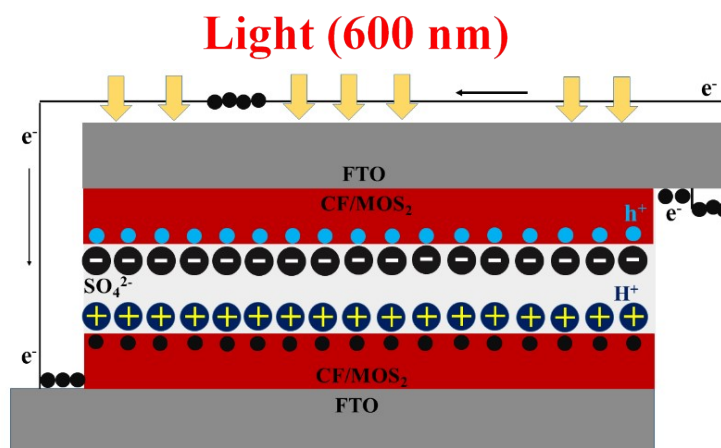

Figure S21: Schematic of CF-MOS<sub>2</sub>/FTO device in photo-recharged condition.

## References

- 1 Z. Fan, J. Yan, T. Wei, L. Zhi, G. Ning, T. Li and F. Wei, *Adv. Funct. Mater.*, 2011, **21**, 2366–2375.
- 2 J. Li, S. Sollami Delekta, P. Zhang, S. Yang, M. R. Lohe, X. Zhuang, X. Feng and M. Östling, *ACS Nano*, 2017, **11**, 8249–8256.
- 3 E. G. Da Silveira Firmiano, A. C. Rabelo, C. J. Dalmaschio, A. N. Pinheiro, E. C. Pereira, W. H. Schreiner and E. R. Leite, *Adv. Energy Mater.*, 2014, **4**, 1–8.
- 4 K. J. Huang, J. Z. Zhang, G. W. Shi and Y. M. Liu, *Electrochim. Acta*, 2014, **132**, 397–403.
- 5 K. Krishnamoorthy, G. K. Veerasubramani, S. Radhakrishnan and S. J. Kim, *Mater. Res. Bull.*, 2014, **50**, 499–502.
- 6 L. Ma, L. M. Xu, X. P. Zhou and X. Y. Xu, *Mater. Lett.*, 2014, **132**, 291–294.
- 7 B. Hu, X. Qin, A. M. Asiri, K. A. Alamry, A. O. Al-Youbi and X. Sun, *Electrochim. Acta*, 2013, **100**, 24–28.
- 8 C. Zhao, Y. Zhou, Z. Ge, C. Zhao and X. Qian, *Carbon*, 2018, **127**, 699–706.
- 9 L. Q. Fan, G. J. Liu, C. Y. Zhang, J. H. Wu and Y. L. Wei, *Int. J. Hydrogen Energy*, 2015, **40**, 10150–10157.
- 10 L. Wang, Y. Ma, M. Yang and Y. Qi, *Appl. Surf. Sci.*, 2017, **396**, 1466–1471.
- 11 P. Wang, C. Zhou, B. Zheng, H. Liu, S. Sun and D. Guo, *Mater. Lett.*, 2018, **233**, 286–289.
- 12 M. K. Hota, Q. Jiang, Y. Mashraei, K. N. Salama and H. N. Alshareef, *Adv. Electron. Mater.*, 2017, 1700185.

- 13 K. H. Huang, C. Te Lin, Y. T. Chen and Y. J. J. Yang, *J. Appl. Phys.*, 2019, **125**, 014902.
- 14 L. Cao, S. Yang, W. Gao, Z. Liu, Y. Gong, L. Ma, G. Shi, S. Lei, Y. Zhang, S. Zhang, R. Vajtai and P. M. Ajayan, *Small*, 2013, **9**, 2905–2910.
- 15 H. Tang, J. Wang, H. Yin, H. Zhao, D. Wang and Z. Tang, *Adv. Mater.*, 2015, **27**, 1117–1123.
- 16 W. Yan, J. Li, G. Zhang, L. Wang and D. Ho, *J. Mater. Chem. A*, 2020, **8**, 554–564.
- 17 X. Shi, Z. S. Wu, J. Qin, S. Zheng, S. Wang, F. Zhou, C. Sun and X. Bao, *Adv. Mater.*, 2017, **29**, 1–9.
- 18 J. Wang, V. K. Bandari, D. Karnaushenko, Y. Li, F. Li, P. Zhang, S. Baunack, D. D. Karnaushenko, C. Becker, M. Faghieh, T. Kang, S. Duan, M. Zhu, X. Zhuang, F. Zhu, X. Feng and O. G. Schmidt, *ACS Nano*, 2019, **13**, 8067–8075.
- 19 C. Yu, H. Xu, Y. Sun, X. Zhao, Z. Hui, Y. Gong, R. Chen, Q. Chen, J. Zhou, G. Sun and W. Huang, *Carbon*, 2020, **170**, 543–549.
- 20 B. Li, X. Liang, G. Li, F. Shao, T. Xia, S. Xu, N. Hu, Y. Su, Z. Yang and Y. Zhang, *ACS Appl. Mater. Interfaces*, 2020, **12**, 39444–39454.
- 21 X. Tang, H. Zhou, Z. Cai, D. Cheng, P. He, P. Xie, D. Zhang and T. Fan, *ACS Nano*, 2018, **12**, 3502–3511.
- 22 Y. Xie, H. Zhang, H. Huang, Z. Wang, Z. Xu, H. Zhao, Y. Wang, N. Chen and W. Yang, *Nano Energy*, 2020, **74**, 104928.
- 23 W. Si, C. Yan, Y. Chen, S. Oswald, L. Han and O. G. Schmidt, *Energy Environ. Sci.*, 2013, **6**, 3218–3223.
- 24 S. W. Kim, J. Hwang, S. J. Ha, J. E. Lee, J. C. Yoon and J. H. Jang, *J. Mater. Chem. A*, 2021, **9**, 928–936.
